# Supplementary material
Source: publisher figshare collection journal article supplement (https://acs.figshare.com/ndownloader/files/6454026)
Supplement: Supplementary file 1 [file 6454026]

Supporting Information

**Applications of Novel Carbon/AlPO<sub>4</sub> Hybrid Coated H<sub>2</sub>Ti<sub>12</sub>O<sub>25</sub> as a High Performance  
Anode for Cylindrical Hybrid Supercapacitors**

Jeong-Hyun Lee<sup>1</sup>, Seung-Hwan Lee<sup>2\*</sup>

<sup>1</sup> Dept. of Electronics Materials Engineering, Kwangwoon University, Seoul 01897, Korea

<sup>2</sup> Institute for Research in Electronics and Applied Physics, University of Maryland, College Park,  
Maryland 20742, USA

Author(s) e-mail addresses

\* shlee83@umd.edu

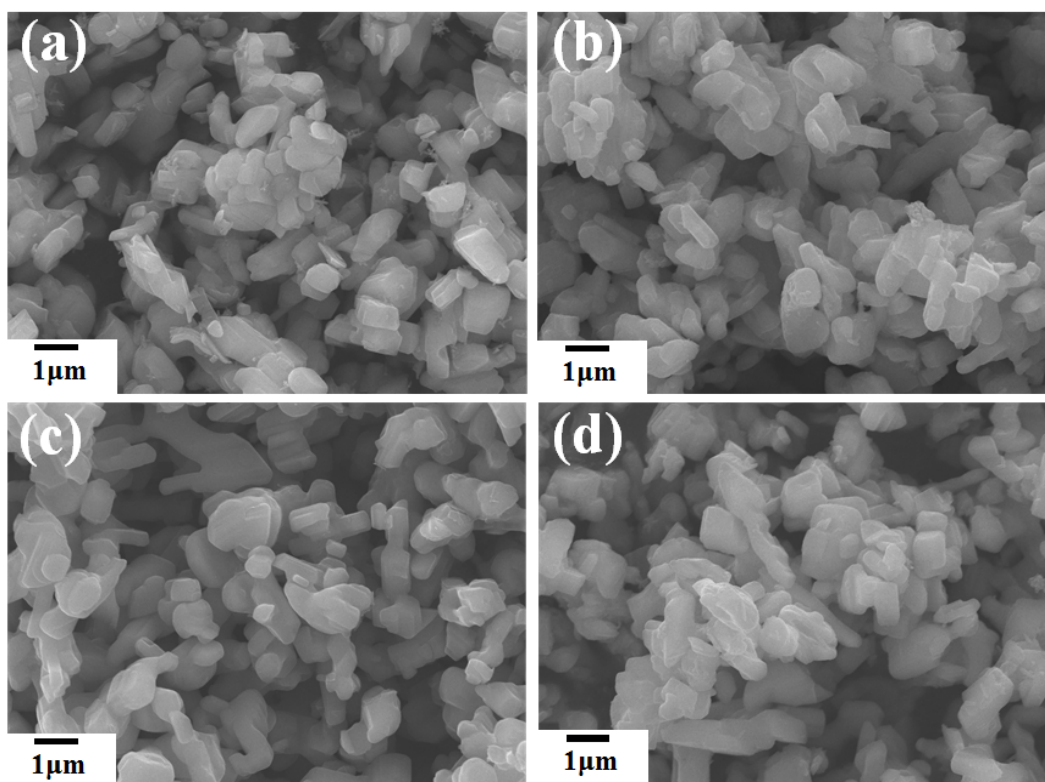

Figure S1. SEM image of (a) pristine, (b) A-HTO, (c) C-HTO, and (d) H-HTO

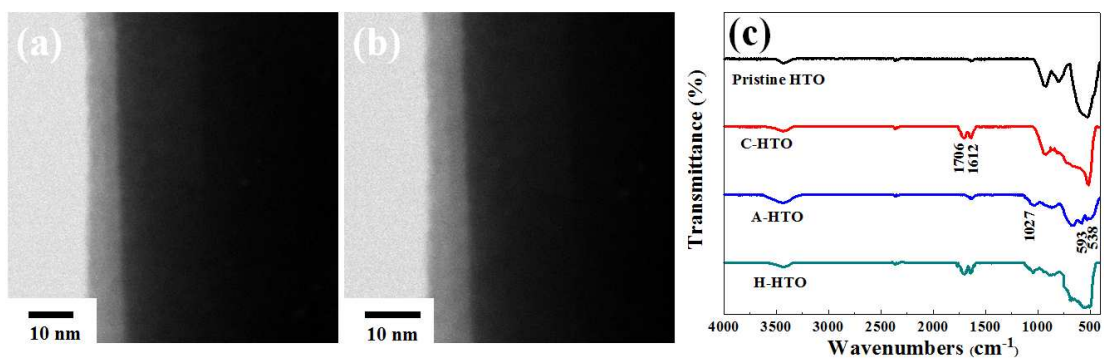

Figure S2. TEM image of (a) A-HTO and (b) C-HTO and (c) FT-IR spectrum of the HTO, A-HTO, C-HTO, H-HTO.

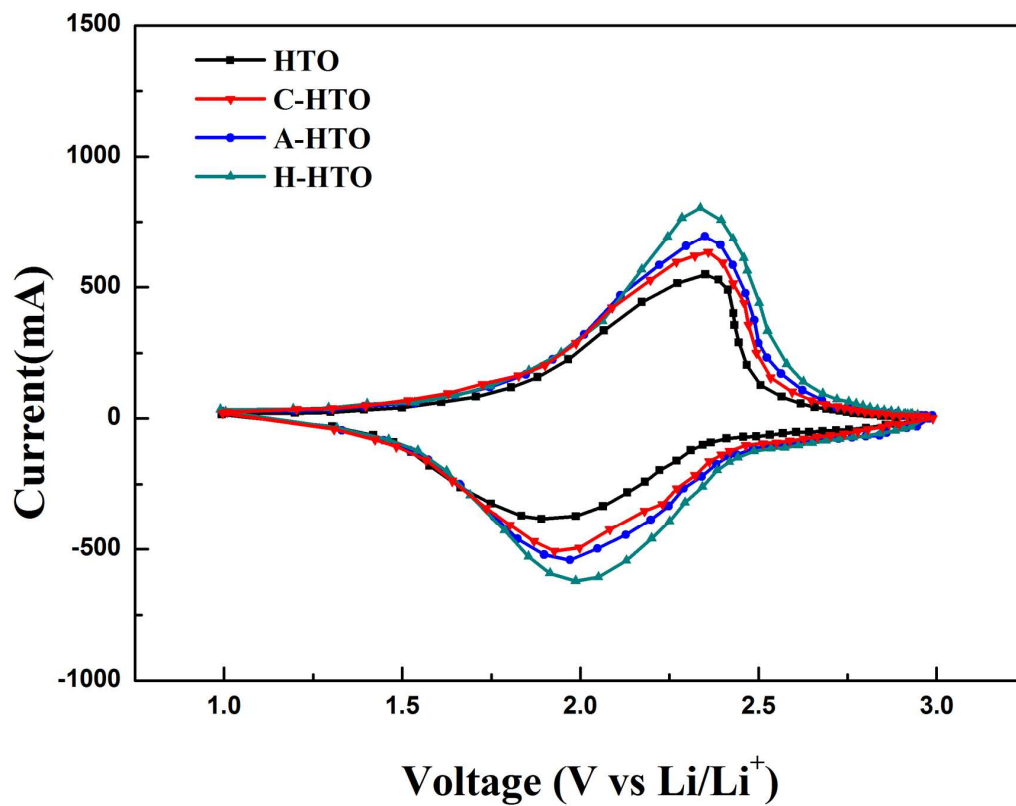

Figure S3. The CV curves of each different surface coated HTO at a scan rate of 5 mVs<sup>-1</sup> between 1.0-3.0 V

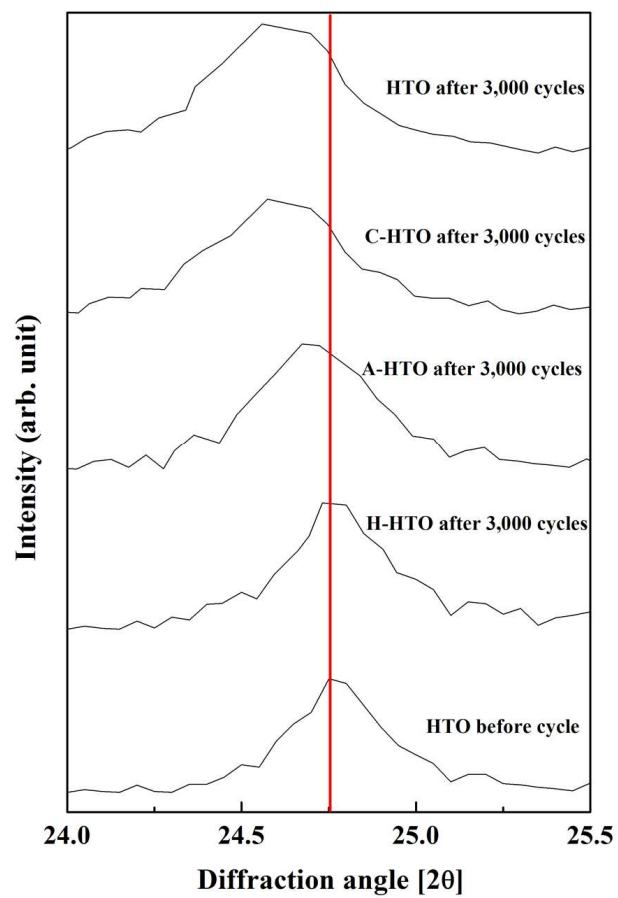

Figure S4 The XRD pattern of each different surface coated HTO after 3000 cycles.
